# Supplementary material for: What influences decisions about ongoing stroke rehabilitation for patients with pre-existing dementia or cognitive impairment: a qualitative study?
Source: PubMed Central journal article supplement (PMC6068967; doi:10.1177/0269215518766406), 2018-03-28
Supplement: cre-2017-6705-File001.pdf [file cre-2017-6705-File001.pdf]

## **Appendix 1: Topic guide**

### **Section 1: Current role**

1. Please can you describe your current role?
2. Are you involved in assessing cognition?
  - If so, can you tell me about it?
  - If not, go to question 4.
3. Do you use any specific assessments to assess cognition?  
*(probe for specifics)*
4. What happens if you identify a patient has cognitive impairment?
5. Who raises the suspicions of a cognitive impairment?
6. Where do you get information about a patient's cognition? And where do you record it?
  - i.e. patient notes, liaison with family, through use of assessment
  - What do you do when no family to ask?
7. What's the purpose/your motivation of identifying cognitive impairment?
8. Have you ever had a patient who you suspected had a pre-stroke cognitive impairment? (for example someone with no diagnosis but was struggling at home) Could you describe them? What did you do?
9. How do you differentiate between old and new impairments?
10. How prevalent do you think pre-stroke cognitive impairment is?
11. Is there anything you found difficult working with patients with pre-existing difficulties?

### **Section 2: Decision making**

1. Are there any considerations you make when treating patients with pre-existing cognitive impairment?
2. Would cognitive impairment change the types of intervention you provide?  
*(probe for example)*
3. How do you explain cognitive difficulties to the patient or family?

### **Section 3: Rehabilitation potential**

1. What is it that makes you think a patient will benefit from rehabilitation or not?

2. What do you think other people base decisions about rehab potential on?
  - a. And what do you base your decisions on?
3. How do you judge willingness to engage?
4. How do you facilitate motivating patient's to engage?
5. Do you think a patient's cognitive impairment affects length of hospital stay?

#### **Section 4: Knowledge and training**

1. Tell me about what, if any, training you have had to support patients with cognitive impairments?  
*(Probe for how and by whom it was delivered, content of training, how (if) it's been used within clinical practice)*
2. What dementia services are available to you and your patients within the hospital or externally?
  - a. What experience have you had of them?
  - b. How could they be improved?
3. Is there anything I haven't asked you that you would like to say?

**Appendix 2: Consolidated criteria for reporting qualitative studies (COREQ):  
32-item checklist**

Developed from: Tong A, Sainsbury P, Craig J. Consolidated criteria for reporting qualitative research (COREQ): a 32-item checklist for interviews and focus groups. *International Journal for Quality in Health Care*. 2007. Volume 19, Number 6: pp. 349 – 357

| No. Item                                       | Guide questions/description                                                                                                               | Reported in section                                                      |
|------------------------------------------------|-------------------------------------------------------------------------------------------------------------------------------------------|--------------------------------------------------------------------------|
| <b>Domain 1: Research team and reflexivity</b> |                                                                                                                                           |                                                                          |
| <i>Personal Characteristics</i>                |                                                                                                                                           |                                                                          |
| 1. Interviewer/facilitator                     | Which author/s conducted the interview or focus group?                                                                                    | Methods                                                                  |
| 2. Credentials                                 | What were the researcher's credentials? E.g. PhD, MD                                                                                      | VL – BSc Psychology, BSc Occupational Therapy, PhD candidate             |
| 3. Occupation                                  | What was their occupation at the time of the study?                                                                                       | PhD candidate                                                            |
| 4. Gender                                      | Was the researcher male or female?                                                                                                        | Female                                                                   |
| 5. Experience and training                     | What experience or training did the researcher have?                                                                                      | Relevant clinical experience, university training in qualitative methods |
| <i>Relationship with participants</i>          |                                                                                                                                           |                                                                          |
| 6. Relationship established                    | Was a relationship established prior to study commencement?                                                                               | Methods                                                                  |
| 7. Participant knowledge of the interviewer    | What did the participants know about the researcher? e.g. personal goals, reasons for doing the research                                  | Methods, Participant Information Sheet                                   |
| 8. Interviewer characteristics                 | What characteristics were reported about the interviewer/facilitator? e.g. Bias, assumptions, reasons and interests in the research topic | Methods                                                                  |

|                                          |                                                                                                                                                          |                     |
|------------------------------------------|----------------------------------------------------------------------------------------------------------------------------------------------------------|---------------------|
| <b>Domain 2: study design</b>            |                                                                                                                                                          |                     |
| <i>Theoretical framework</i>             |                                                                                                                                                          |                     |
| 9. Methodological orientation and Theory | What methodological orientation was stated to underpin the study? e.g. grounded theory, discourse analysis, ethnography, phenomenology, content analysis | Methods             |
| <i>Participant selection</i>             |                                                                                                                                                          |                     |
| 10. Sampling                             | How were participants selected? e.g. purposive, convenience, consecutive, snowball                                                                       | Methods             |
| 11. Method of approach                   | How were participants approached? e.g. face-to-face, telephone, mail, email                                                                              | Methods             |
| 12. Sample size                          | How many participants were in the study?                                                                                                                 | Results             |
| 13. Non-participation                    | How many people refused to participate or dropped out? Reasons?                                                                                          | None                |
| <i>Setting</i>                           |                                                                                                                                                          |                     |
| 14. Setting of data collection           | Where was the data collected? e.g. home, clinic, workplace                                                                                               | Methods             |
| 15. Presence of non-participants         | Was anyone else present besides the participants and researchers?                                                                                        | Methods             |
| 16. Description of sample                | What are the important characteristics of the sample? e.g. demographic data, date                                                                        | Results             |
| <i>Data collection</i>                   |                                                                                                                                                          |                     |
| 17. Interview guide                      | Were questions, prompts, guides provided by the authors? Was it pilot tested?                                                                            | Methods, appendix 1 |
| 18. Repeat interviews                    | Were repeat interviews carried out? If yes, how many?                                                                                                    | No                  |
| 19. Audio/visual recording               | Did the research use audio or visual recording to collect the data?                                                                                      | Methods             |

|                                        |                                                                                                                                 |                             |
|----------------------------------------|---------------------------------------------------------------------------------------------------------------------------------|-----------------------------|
| 20. Field notes                        | Were field notes made during and/or after the interview or focus group?                                                         | Methods                     |
| 21. Duration                           | What was the duration of the interviews or focus group?                                                                         | Results                     |
| 22. Data saturation                    | Was data saturation discussed?                                                                                                  | Methods                     |
| 23. Transcripts returned               | Were transcripts returned to participants for comment and/or correction?                                                        | No                          |
| <b>Domain 3: analysis and findings</b> |                                                                                                                                 |                             |
| <i>Data analysis</i>                   |                                                                                                                                 |                             |
| 24. Number of data coders              | How many data coders coded the data?                                                                                            | Methods                     |
| 25. Description of the coding tree     | Did authors provide a description of the coding tree?                                                                           | N/A                         |
| 26. Derivation of themes               | Were themes identified in advance or derived from the data?                                                                     | Methods                     |
| 27. Software                           | What software, if applicable, was used to manage the data?                                                                      | Methods                     |
| 28. Participant checking               | Did participants provide feedback on the findings?                                                                              | No                          |
| <i>Reporting</i>                       |                                                                                                                                 |                             |
| 29. Quotations presented               | Were participant quotations presented to illustrate the themes/findings? Was each quotation identified? e.g. participant number | Findings                    |
| 30. Data and findings consistent       | Was there consistency between the data presented and the findings?                                                              | Yes, findings.              |
| 31. Clarity of major themes            | Were major themes clearly presented in the findings?                                                                            | Yes, findings and figure 1. |
| 32. Clarity of minor themes            | Is there a description of diverse cases or discussion of minor themes?                                                          | Yes, findings.              |
